# Supplementary material
Source: ML conference proceedings conference paper supplement (https://proceedings.neurips.cc/paper_files/paper/2017/hash/95f8d9901ca8878e291552f001f67692-Abstract.html)
Supplement: Supplementary file [file 95f8d9901ca8878e291552f001f67692-Supplemental.zip]

---

# Supplementary Material for Estimating Accuracy from Unlabeled Data: A Probabilistic Logic Approach

---

**Emmanouil A. Platanios**  
Carnegie Mellon University  
Pittsburgh, PA  
e.a.platanios@cs.cmu.edu

**Hoifung Poon**  
Microsoft Research  
Redmond, WA  
hoifung@microsoft.com

**Tom M. Mitchell**  
Carnegie Mellon University  
Pittsburgh, PA  
tom.mitchell@cs.cmu.edu

**Eric Horvitz**  
Microsoft Research  
Redmond, WA  
horvitz@microsoft.com

## 1 Grounding Algorithm

---

**Algorithm 1:** Grounding algorithm.

---

**Input:**  $\hat{f}_j^d(X)$ , for  $d = 1, \dots, D$ , and  $j = 1, \dots, N^d$ , only for observed values, set of all pairwise mutual-exclusion constraints  $ME = \{d_1^i, d_2^i\}_{i=1}^M$ , and set of all subsumption constraints  $SUB = \{d_1^i, d_2^i\}_{i=1}^S$ .

```

1 Create empty sets  $G_p$  and  $G_l$ 
2 foreach observed  $\hat{f}_j^d(X)$  do
3   Add  $\hat{f}_j^d(X)$ ,  $e_j^d$ , and  $f^d(X)$  to  $G_p$ 
4   Add  $\hat{f}_j^d(X) \wedge \neg e_j^d \rightarrow f^d(X)$  and  $\neg \hat{f}_j^d(X) \wedge \neg e_j^d \rightarrow \neg f^d(X)$  to  $G_l$ 
5   Add  $\hat{f}_j^d(X) \wedge e_j^d \rightarrow \neg f^d(X)$  and  $\neg \hat{f}_j^d(X) \wedge e_j^d \rightarrow f^d(X)$  to  $G_l$ 
6   Add  $\hat{f}_j^d(X) \rightarrow f^d(X)$  and  $\neg \hat{f}_j^d(X) \rightarrow \neg f^d(X)$  to  $G_l$ 
7   foreach pair  $(d_1, d_2)$  in  $ME$  do
8     if  $d_1 = d$  then
9       Add  $f^{d_2}(X)$  to  $G_p$ 
10      Add  $ME(d_1, d_2) \wedge \hat{f}_j^{d_1}(X) \wedge f^{d_2}(X) \rightarrow e_j^{d_1}$  to  $G_l$ 
11     else if  $d_2 = d$  then
12       Add  $f^{d_1}(X)$  to  $G_p$ 
13       Add  $ME(d_2, d_1) \wedge \hat{f}_j^{d_2}(X) \wedge f^{d_1}(X) \rightarrow e_j^{d_2}$  to  $G_l$ 
14   foreach pair  $(d_1, d_2)$  in  $SUB$  do
15     if  $d_1 = d$  then
16       Add  $f^{d_2}(X)$  to  $G_p$ 
17       Add  $SUB(d_1, d_2) \wedge \neg \hat{f}_j^{d_1}(X) \wedge f^{d_2}(X) \rightarrow e_j^{d_1}$  to  $G_l$ 

```

**Output:** Set of ground predicates  $G_p$  and set of ground rules  $G_l$ .

---

## 2 PSL Consensus ADMM Inference Algorithm

---

**Algorithm 2:** PSL consensus ADMM inference algorithm.

---

**Input:** Observed ground predicate values  $\mathbf{X}$ , objective terms  $\ell$ ,  $p$ , rule weights  $\lambda$ , parameter  $\rho$ , and mapping from variable copies' indices to consensus variables' indices  $\mathcal{G}$ .

- 1 Randomly initialize all  $\mathbf{Y}$  (consensus variables) and  $\alpha_j$  (Lagrange multipliers) for  $j = 1, \dots, k$ , and then randomly initialize the variable copies  $\mathbf{y}_j$  for  $j = 1, \dots, k$ , corresponding to each subproblem
- 2 **while** *not converged* **do**
- 3     **for**  $i = 1, \dots, k$  **do**
- 4          $\alpha_j \leftarrow \alpha_j + \rho(\mathbf{y}_j - \mathbf{Y}_{\mathcal{G}(j,:)})$
- 5          $\mathbf{y}_j \leftarrow \arg \min_{\mathbf{y}_j} [\lambda_j [\max\{\ell_j(\mathbf{X}, \mathbf{y}_j)\}]^{p_j}$
- 6              $+ \frac{\rho}{2} \|\mathbf{y}_j - \mathbf{Y}_{\mathcal{G}(j,:)} + \frac{1}{\rho} \alpha_j\|_2^2]$
- 7     **for**  $i = 1, \dots, \text{length}(\mathbf{Y})$  **do**
- 8          $\mathbf{Y}_i \leftarrow \frac{\sum_{\mathcal{G}(j,d)=i} (\mathbf{y}_j)_d + \frac{1}{\rho} [\alpha_j]_d}{\sum_{\mathcal{G}(j,d)=i} \mathbf{1}}$
- 9         Project  $\mathbf{Y}_i$  on the interval  $[0, 1]$

**Output:** Inferred ground predicate values  $\mathbf{Y}$ .

---
